# Supplementary material for: Transcriptional profiling of maturing tomato (Solanum lycopersicum L.) microspores reveals the involvement of heat shock proteins, ROS scavengers, hormones, and sugars in the heat stress response
Source: PubMed Central journal article supplement — J Exp Bot. 2009 Jul 23;60(13):3891–908. doi: 10.1093/jxb/erp234 (PMC2736902; doi:10.1093/jxb/erp234), 2009-07-23
Supplement: erp234_1.pdf [file erp234_1.pdf]

1 **Transcriptional profiling of maturing tomato (*Solanum lycopersicum***  
2 **L.) microspores reveals the involvement of heat shock proteins, ROS**  
3 **scavengers, hormones and sugars in the heat-stress response**

4

5 **Gil Frank<sup>1</sup>, Etan Pressman<sup>1</sup>, Ron Ophir<sup>2</sup>, Levia Althan<sup>1</sup>, Rachel Shaked<sup>1</sup>, Moshe**  
6 **Freedman<sup>1</sup>, Shmuel Shen<sup>1</sup> and Nurit Firon<sup>1,\*</sup>**

7 <sup>1</sup> *Department of Vegetable Research, Institute of Plant Sciences, The Volcani Center,*  
8 *Agricultural Research Organization, P. O. B. 6, Bet Dagan, 50250, Israel.*

9 <sup>2</sup> *Department of Fruit Tree Sciences, Institute of Plant Sciences, The Volcani Center,*  
10 *Agricultural Research Organization, P. O. B. 6, Bet Dagan, 50250, Israel.*

11

12

13

14

15

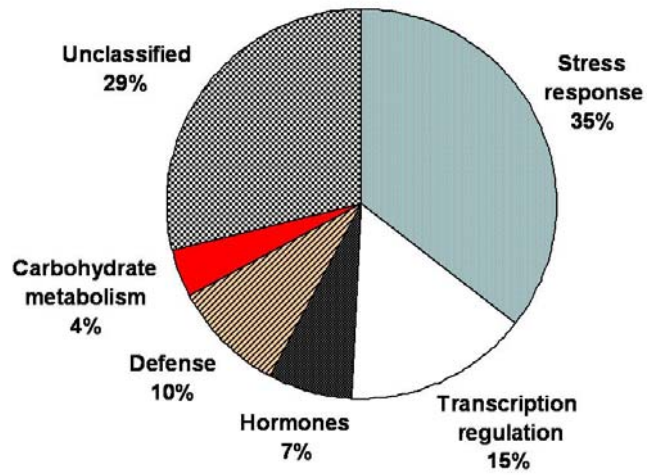

1  
2

3 **Fig. S1.** Graphical representation of the percentage of genes belonging to a given  
4 functional group for the 104 heat-regulated genes that are presented in Table S3.

1  
2  
3  
4  
5  
6  
7  
8  
9  
10  
11  
12  
13  
14  
15  
16  
17  
18  
19  
20  
21  
22  
23  
24  
25  
26  
27  
28  
29  
30  
31  
32  
33  
34  
35  
36  
37  
38

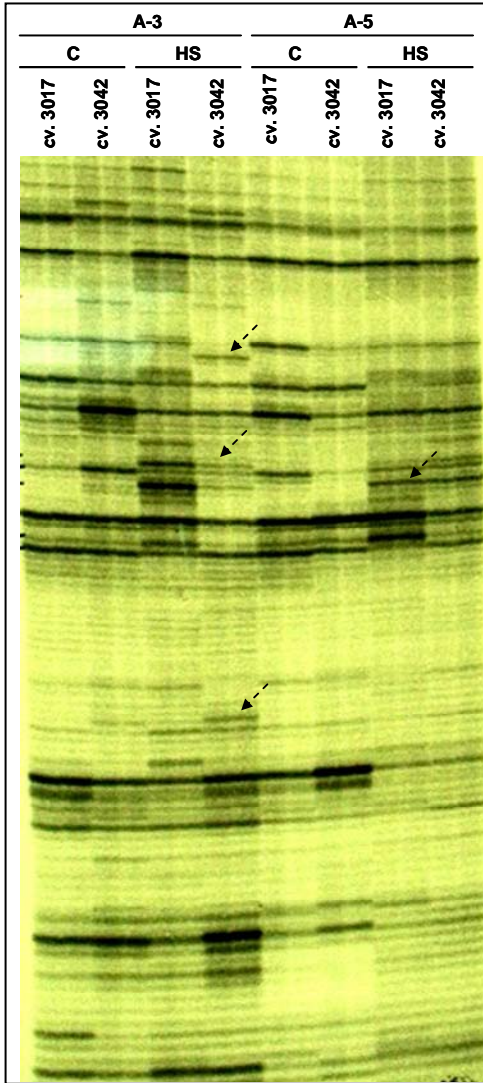

**Fig. S2.** Autoradiography of a representative cDNA-AFLP polyacrylamide gel. Amplicons resulting from one specific primer combination (*EcoRI*-ACT/ *MseI*-CTT) were separated electrophoretically. There are 8 duplicated lanes (total of 16 lanes), corresponding to differentially expressed fragments of maturing microspores at developmental stages A-3 and A-5 (3 and 5 days before anthesis, respectively) derived from plants of *cv.* 3017 and *cv.* 3042, which had been either kept under control conditions (C, 26/22 °C day/night temperatures) or exposed to HS (2 h at 43-45 °C). Arrows point to TDFs that exhibit differential expression patterns.

**Table S1.** List of adapters and primers used for cDNA-AFLP application

| <b>A.</b>                           | <b>Forward</b>                    | <b>Reverse</b>                    |
|-------------------------------------|-----------------------------------|-----------------------------------|
| EcoRI adapters                      | 5' CTCGTAGACTGCGTACC 3'           | 3' AATTGGTACGCAGTCTAC 5'          |
| MseI adapters                       | 5' TACTCAGGACTCAT 3'              | 3' GACGATGAGTCCTGAG 5'            |
| <b>B.</b>                           |                                   |                                   |
| Pre-selective amplification primers | 5' GACTGCGTACCAATTCA 3'           | 5' GATGAGTCCTGAGTAAC 3'           |
| Selective amplification primers*    | 5' GACTGCGTACCAATT <u>CACT</u> 3' | 5' CATGAGTCCTGAGTA <u>ACTG</u> 3' |
|                                     | 5' GACTGCGTACCAATT <u>CACA</u> 3' | 5' CATGAGTCCTGAGTA <u>ACTT</u> 3' |
|                                     | 5'GACTGCGTACCAATT <u>CACC</u> '3  | 5' CATGAGTCCTGAGTAACAG 3'         |
|                                     | 5' GACTGCGTACCAATT <u>CAAC</u> 3' | 5' CATGAGTCCTGAGTA <u>ACAT</u> 3' |
|                                     |                                   | 5' CATGAGTCCTGAGTA <u>ACTA</u> 3' |
|                                     |                                   | 5' CATGAGTCCTGAGTA <u>ACTC</u> 3' |
|                                     |                                   | 5' CATGAGTCCTGAGTA <u>ACAA</u> 3' |
|                                     |                                   | 5' CATGAGTCCTGAGTA <u>ACAC</u> 3' |

\*All possible *EcoRI* X *MseI* primer combinations were used (except for *EcoRI*-AAC X *MseI*-CTG/CAA/CAC), resulting in a total of 29 combinations.

**Table S2.** List of primer sequences used for semi-quantitative RT-PCR analysis for validation of (A) microarray and (B) cDNA-AFLP results

**A.** Sequences of semi-quantitative RT-PCR primers used for validating the microarray results

| Gene symbol                               | Accession | Affy ID               | Forward primer              | Reverse primer             | **Amp. length |
|-------------------------------------------|-----------|-----------------------|-----------------------------|----------------------------|---------------|
| <i>LeHSP17.4-CII*</i>                     | AF090115  | Les.3578.1.S1_at      | 5' TCTCTTCTTCCCTCTTCCCTT 3' | 3' TAACACACCACTCTTCCACA 5' | 251           |
| <i>Small heat shock protein (vis1)</i>    | AY128100  | Les.3677.1.S1_at      | 5' ACTCTGTCCATTGTGTCCAT 3'  | 3' ATTCCAACCTCTCTTCCA 5'   | 223           |
| <i>LeHSP21</i>                            | U66300    | Les.269.1.S1_at       | 5' TGGGAGACTTAAACGAGTGT 3'  | 3' AGGAAGAAACAGAGCATCAG 5' | 238           |
| <i>LeMTHSP23.8</i>                        | AB017134  | Les.4150.1.S1_at      | 5' CGTTATCGTCCTCCTTTACA 3'  | 3' CAGCTTATGACCAGGATGAT 5' | 249           |
| <i>SIAPX3</i>                             | DQ096286  | LesAffx.3918.1.S1_at  | 5' TGTCTCCCAGGATGAAAAGG 3'  | 3' ATCGACGTTTGATCGGAGAA 5' | 335           |
| <i>LpHSF30</i>                            | X67601    | LesAffx.24696.1.S1_at | 5' CAACCTCAACACATGACATC 3'  | 3' GTGGTGTGGGATTCTCATAA 5' | 250           |
| <i>LeMBF1 (ER24)</i>                      | EU240881  | Les.3551.1.S1_at      | 5' CACTGCCTTACCATTCTCAT 3'  | 3' CACAAGTTCAAACGGTGAAG 5' | 242           |
| <i>LeDREB1</i>                            | AF500011  | Les.3985.1.S1_at      | 5' TGCACAAGGACCATACATAG 3'  | 3' AGTGCGTAAAGTTCTGCTA 5'  | 235           |
| <i>LeACS3</i>                             | U17972    | Les.3642.1.S1_at      | 5' TCGAATCCAGGATAGTATGG 3'  | 3' CTGGGTTTAAGAGAAATGGA 5' | 247           |
| 18S ribosomal RNA; <i>S. lycopersicum</i> | X51576    |                       | 5' CTCCGGAATCGAACCCCTAAT 3' | 3' CTTCTGGAAGGGATGCATTT 5' | 200           |

\* The primers used may amplify LeHSP17.6-CII cDNA (accession U72396) as well.

**B.** Sequences of semi-quantitative RT-PCR primers used for validating the cDNA-AFLP results

| TDF number     | Homologue gene                                     | Accession | Forward primer              | Reverse primer             | **Amp. length |
|----------------|----------------------------------------------------|-----------|-----------------------------|----------------------------|---------------|
| TDF3.2         | <i>LeHSP90</i>                                     | AF123259  | 5' GGATTTGCTGCTTACACAAC 3'  | 3' GGTTGAGCATAGACGAAGAA 5' | 246           |
| TDF3.1         | <i>AtHSP81-1</i>                                   | AT5G52640 | 5' CTGAGTAACAATCTGGGTACG 3' | 3' CTCAACTGGTCTTCTTGGAG 5' | 283           |
| TDF31          | <i>AtCDPK2</i>                                     | AT1G35670 | 5' GAGTCCTGAGTAACATCACCA 3' | 3' GCATTAAAAGGAGAGAGGAG 5' | 131           |
| TDF18.1        | <i>AtVAMP725</i>                                   | AT2G32670 | 5' GACCCAAATTCCTATTGAGG 3'  | 3' GAAATTCCTTGCCTTCTT 5'   | 110           |
| TDF4.2         | <i>AtGAE5</i>                                      | AT4G12250 | 5' TGGGCTTTCCTTTTGGTATG 3'  | 3' TGCAGGTCTCGTTACCCTTT 5' | 308           |
| TDF12.1        | <i>LeTFT9</i>                                      | X98865    | 5' TCACTCTGCATCTTACCTC 3'   | 3' GGATAGCCTGAATGAGGATT 5' | 160           |
| TDF3.3         | <i>AtCDC48</i>                                     | AT3G53230 | 5' GCAGGGTCAATAATATCAGG 3'  | 3' GCTCTAGGAAGTACATCCA 5'  | 532           |
| TDF6.1         | Adenylyl-sulfate reductase; <i>S. lycopersicum</i> | AY568717  | 5' TGATACTGGGAGGTTGAATC 3'  | 3' TCAAACGAAGGGTCTATCTG 5' | 298           |
| TDF10.1        | <i>LAT56; S. lycopersicum</i>                      | X15500    | 5' ATGTCACCTCTTTCACCAAC 3'  | 3' CTGTTGCTGGTCCACTAAT 5'  | 309           |
| Reference gene | 18S ribosomal RNA; <i>S. lycopersicum</i>          | X51576    | 5' CTCCGGAATCGAACCCCTAAT 3' | 3' CTTCTGGAAGGGATGCATTT 5' | 200           |

\*\* Amp. length – amplicon length in bp.

**Table S3.** Complete list of genes with significant ( $p$ -value $<0.05$ ) differential expression ( $>2.0$ -fold) between heat-stressed and control maturing microspores

| Affy ID                             | Accession/<br>AGI No. <sup>a</sup> | E-<br>value <sup>b</sup> | Gene description <sup>c</sup>                                                                | Arabidopsis<br>ortholog <sup>d</sup> | Fold <sup>e</sup> |
|-------------------------------------|------------------------------------|--------------------------|----------------------------------------------------------------------------------------------|--------------------------------------|-------------------|
| <b><i>Stress response</i></b>       |                                    |                          |                                                                                              |                                      |                   |
| <b><i>Hsps</i></b>                  |                                    |                          |                                                                                              |                                      |                   |
| LesAffx.69957.1.S1_at <sup>BH</sup> | AT1G52560                          | 8E-50                    | 26.5 kDa class I small heat shock protein-like (AtHSP26.5-P-CI); <i>A. thaliana</i>          |                                      | 158               |
| Les.269.1.S1_at <sup>BH</sup>       | U66300                             | 1E-132                   | Chloroplast heat shock protein (LeHSP21); <i>S. lycopersicum</i>                             | AT4G27670                            | 155               |
| Les.3739.1.S1_at <sup>BH</sup>      | AB026983                           | 5E-116                   | Endoplasmic reticulum-located small heat shock protein (LeERHSP21.5); <i>S. lycopersicum</i> | AT4G10250                            | 154               |
| LesAffx.10596.1.S1_at <sup>BH</sup> | AT5G59720                          | 1E-63                    | 18.2kDa heat shock protein (AtHSP18.2); <i>A. thaliana</i>                                   |                                      | 141               |
| Les.3677.1.S1_at <sup>BH</sup>      | AY128100                           | 1E-134                   | Small heat shock protein ( <i>vis1</i> ); <i>S. lycopersicum</i>                             | AT4G27670                            | 132               |
| Les.4004.1.S1_a_at <sup>BH</sup>    | AF123256                           | 2E-66                    | 17.8 kDa class I small heat shock protein (LeHSP17.8- CI); <i>S. lycopersicum</i>            | AT1G07400                            | 93                |
| Les.4150.1.S1_at <sup>BH</sup>      | AB017134                           | 2E-131                   | Mitochondrial small heat shock protein (LeMTHSP23.8); <i>S. lycopersicum</i>                 | AT4G25200                            | 82                |
| Les.3578.1.S1_at <sup>BH</sup>      | AF090115                           | 2E-99                    | Cytosolic class II small heat shock protein HCT2 (LeHSP17.4- CII ); <i>S. lycopersicum</i>   | AT5G12020                            | 75                |
| LesAffx.70264.1.S1_at <sup>BH</sup> | AB333795                           | 6E-49                    | Peroxisomal small heat shock protein (GmPHS-P); <i>Glycine max</i>                           | AT5G37670                            | 64                |
| Les.3581.1.S1_at                    | U72396                             | 3E-68                    | Class II small heat shock protein (LeHSP17.6- CII) ; <i>S. lycopersicum</i>                  | AT5G12030                            | 40                |
| LesAffx.31298.1.S1_at               | AF123255                           | 2E-31                    | 17.7 kDa class I small heat shock protein (LeHSP17.7- CI) ; <i>S. lycopersicum</i>           | AT1G59860                            | 5                 |
| Les.3550.1.S1_at <sup>BH</sup>      | AF096251                           | 7E-7                     | Ethylene-responsive heat shock protein cognate 70 (LeHSC70/ ER21); <i>S. lycopersicum</i>    |                                      | 83                |
| LesAffx.34336.1.S1_at <sup>BH</sup> | AT2G32120                          | 1E-112                   | HSP70T-2; <i>A. thaliana</i>                                                                 |                                      | 36                |
| LesAffx.10807.1.S1_at               | X13301                             | 3E-29                    | Heat shock protein hsp70 (PhHSP70) ; <i>Petunia x hybrida</i>                                | AT5G02490                            | 7                 |
| Les.3401.3.S1_at                    | EU404167                           | 8E-57                    | Hsp70-interacting protein 1; <i>Vitis labrusca</i>                                           | AT4G22670                            | 6                 |
| Les.3401.2.S1_at                    | EU404167                           | 8E-57                    | Hsp70-interacting protein 1; <i>Vitis labrusca</i>                                           | AT4G22670                            | 5                 |
| Les.3550.1.A1_s_at                  | AF096251                           |                          | Ethylene-responsive heat shock protein cognate 70 (LeHSC70/ ER21); <i>S. lycopersicum</i>    |                                      | 5                 |
| Les.3134.1.S1_at                    | AF123259                           | 7E-60                    | Heat shock protein 90 (LeHSP90); <i>S. lycopersicum</i>                                      |                                      | 5                 |
| LesAffx.56637.1.S1_at <sup>BH</sup> | AT3G09700                          | 2E-29                    | DNAJ heat shock N-terminal domain-containing protein; <i>A. thaliana</i>                     |                                      | 70                |
| Les.4705.1.S1_at                    | AT4G21320                          | 1E-134                   | Heat stress associated 32 (AtHSA32); <i>A. thaliana</i>                                      |                                      | 23                |

| Affy ID                                         | Accession/<br>AGI No. <sup>a</sup> | E-<br>value <sup>b</sup> | Gene description <sup>c</sup>                                                                                         | Arabidopsis<br>ortholog <sup>d</sup> | Fold <sup>e</sup> |
|-------------------------------------------------|------------------------------------|--------------------------|-----------------------------------------------------------------------------------------------------------------------|--------------------------------------|-------------------|
| Les.4955.1.S1_at                                | AT1G30070                          | 2E-14                    | SGS domain-containing protein; <i>A. thaliana</i>                                                                     |                                      | 16                |
| LesAffx.58365.1.S1_at                           | AT3G08970                          | 2E-37                    | DNAJ heat shock N-terminal domain-containing protein; <i>A. thaliana</i>                                              |                                      | 6                 |
| <b><i>Oxidative stress</i></b>                  |                                    |                          |                                                                                                                       |                                      |                   |
| Les.5622.1.S1_at <sup>BH</sup>                  | AT3G16050                          | 1E-143                   | Pyridoxal phosphate synthase protein (AtPDX1); <i>A. thaliana</i>                                                     |                                      | 64                |
| LesAffx.3918.1.S1_at <sup>BH</sup>              | DQ096286                           | 4E-108                   | Cytosolic Ascorbate peroxidase 3 (SIAPX3); <i>S. lycopersicum</i>                                                     | AT3G09640                            | 53                |
| Les.1132.1.A1_at <sup>BH</sup>                  | AT1G17870                          | 2E-43                    | Ethylene-dependent gravitropism-deficient and yellow-green-like (ATEGY3);<br><i>A. thaliana</i>                       |                                      | 32                |
| LesAffx.33042.1.S1_at                           | X53393                             | 4E-25                    | Cytochrome c oxidase subunit Vc; <i>Sweet potato</i>                                                                  | AT2G47380                            | 16                |
| Les.3011.1.S1_at                                | AF243522                           | 0                        | Light dependent NADH:protochlorophyllide oxidoreductase 2; <i>S. lycopersicum</i>                                     | AT2G27680                            | 12                |
| Les.1936.1.S1_at                                | AY547273                           | 1E-79                    | Early light-inducible protein (LeELIP); <i>S. lycopersicum</i>                                                        | AT3G22840                            | 7                 |
| Les.4709.1.S1_at                                | AT2G27680                          | 0                        | Aldo/keto reductase family protein; <i>A. thaliana</i>                                                                |                                      | 6                 |
| Les.4223.1.S1_at                                | AY034148                           | 0                        | Alternative oxidase 1a (LeAOX1a); <i>S. lycopersicum</i>                                                              | AT3G22370 <sup>P</sup>               | 5                 |
| Les.1724.1.S1_at                                | AB087837                           | 9E-65                    | Glutathione S-transferase (PsGST); <i>Pisum sativum</i>                                                               | AT5G02790                            | 4                 |
| Les.1724.2.S1_at                                | AI776156                           | 1E-12                    | Glutathione S-transferase (PsGST); <i>Pisum sativum</i>                                                               | AT5G02790                            | 4                 |
| <b><i>Others</i></b>                            |                                    |                          |                                                                                                                       |                                      |                   |
| LesAffx.47187.1.S1_at <sup>BH</sup>             | AT3G03270                          | 4E-55                    | Universal stress protein (USP) family protein/ early nodulin ENOD18 family<br>protein; <i>A. thaliana</i>             |                                      | 28                |
| Les.2255.1.S1_at                                | AT1G77000                          | 1E-177                   | Ubiquitin-protein ligase AtSKP2B; <i>A. thaliana</i>                                                                  |                                      | 6                 |
| LesAffx.1790.1.S1_at                            | AF452011                           | 1E-142                   | Aquaporin-like protein (PIP1;2); <i>Petunia x hybrida</i>                                                             | AT4G00430                            | 5                 |
| Les.3392.2.S1_at                                | AT1G62740                          | 7E-59                    | Stress-inducible protein; <i>A. thaliana</i>                                                                          |                                      | 5                 |
| Les.3392.3.S1_at                                | AF512999                           | 2E-84                    | TPR1 (MsTRP1); <i>Medicago sativa</i>                                                                                 | AF512999                             | 5                 |
| <b><i>Hormone metabolism &amp; response</i></b> |                                    |                          |                                                                                                                       |                                      |                   |
| <b><i>Ethylene</i></b>                          |                                    |                          |                                                                                                                       |                                      |                   |
| Les.3551.1.S1_at <sup>BH; BY</sup>              | EU240881*                          | 5E-113                   | ethylene-responsive transcriptional coactivator multiprotein bridging factor<br>ER24 (LeMBF1); <i>S. lycopersicum</i> | AT3G24500                            | 156               |
| Les.3550.1.S1_at                                | AF096251*                          | 7E-7                     | Ethylene-responsive heat shock protein cognate 70 (ER21); <i>S. lycopersicum</i>                                      |                                      | 83                |
| Les.3985.1.S1_at <sup>BH</sup>                  | AF500011*                          | 3E-179                   | Dehydration responsive element binding protein (LeDREB1); <i>S. lycopersicum</i>                                      | AT5G05410                            | 14                |
| Les.2322.1.A1_at                                | AY044235*                          | 2E-103                   | Jasmonate and Ethylene responsive factor 1 (LeJERF1); <i>S. lycopersicum</i>                                          | AT1G53910                            | 9                 |
| Les.3642.1.S1_at                                | U17972                             | 0                        | 1-aminocyclopropane-1-carboxylate synthase 3/ ACC synthase 3                                                          | AT4G37770                            | 6                 |

| Affy ID                             | Accession/<br>AGI No. <sup>a</sup> | E-<br>value <sup>b</sup> | Gene description <sup>c</sup>                                                                                       | Arabidopsis<br>ortholog <sup>d</sup> | Fold <sup>e</sup> |
|-------------------------------------|------------------------------------|--------------------------|---------------------------------------------------------------------------------------------------------------------|--------------------------------------|-------------------|
| Les.3766.1.S1_at                    | U77719                             | 1E-108                   | (LeACS3); <i>S. lycopersicum</i><br>Ethylene-responsive late embryogenesis-like protein (ER5); <i>L. esculentum</i> | AT2G46140 <sup>P</sup>               | 4                 |
| <b>ABA</b>                          |                                    |                          |                                                                                                                     |                                      |                   |
| Les.4807.1.S1_at <sup>BH</sup>      | AT5G13200                          | 1E-111                   | ABA-responsive protein-related/ GRAM domain-containing protein; <i>A. thaliana</i>                                  |                                      | 25                |
| Les.5956.1.S1_s_at                  | AF386075                           | 3E-40                    | Dehydrin 2 (DHN2); <i>Solanum commersonii</i>                                                                       | AT1G20440                            | 4                 |
| LesAffx.3568.1.S1_a_at              | AB049338                           | 4E-07                    | Dehydrin (NtERD10); <i>Nicotiana tabacum</i>                                                                        | AT1G20450                            | 4                 |
| <b>Jasmonic acid</b>                |                                    |                          |                                                                                                                     |                                      |                   |
| Les.368.1.S1_at <sup>BH</sup>       | DQ359730                           | 6E-34                    | Jasmonate resistance 1-like protein (NaJAR6); <i>Nicotiana attenuate</i>                                            | AT2G46370                            | 43                |
| Les.13.1.S1_at                      | AJ271093                           | 0                        | Allene oxide synthase (LeAOS); <i>L. esculentum</i>                                                                 | AT5G42650                            | 14                |
| Les.2322.1.A1_at                    | AY044235*                          | 2E-103                   | Jasmonate and Ethylene responsive factor 1 (LeJERF1); <i>S. lycopersicum</i>                                        | AT1G53910                            | 9                 |
| <b>Defense</b>                      |                                    |                          |                                                                                                                     |                                      |                   |
| LesAffx.66384.1.S1_at <sup>BH</sup> | AT1G12060                          | 2E-20                    | BCL-2-Associated athanogene 5 (AtBAG5); <i>A. thaliana</i>                                                          |                                      | 56                |
| LesAffx.58019.1.S1_at <sup>BH</sup> | AT5G20740                          | 1E-29                    | Invertase/pectin methylesterase inhibitor family protein; <i>A. thaliana</i>                                        |                                      | 44                |
| Les.4462.1.S1_at                    | X59884                             |                          | Wound induced protein; <i>S. lycopersicum</i>                                                                       |                                      | 35                |
| LesAffx.1881.1.S1_at <sup>BH</sup>  | AT4G36010                          | 6E-73                    | Pathogenesis-related thaumatin family protein; <i>A. thaliana</i>                                                   |                                      | 19                |
| LesAffx.68306.1.S1_at               | AF493074                           | 1E-23                    | Susceptibility antioxidant protein (OsRREO); <i>Oryza sativ</i>                                                     | AT2G35050                            | 9                 |
| Les.5510.1.S1_at                    | AT2G37970                          | 1E-89                    | AtSOUL-1; <i>A. thaliana</i>                                                                                        |                                      | 8                 |
| LesAffx.65922.1.S1_at               | AT2G26040                          | 3E-13                    | Bet v I allergen family protein; <i>A. thaliana</i>                                                                 |                                      | 6                 |
| Les.4099.1.S1_at                    | AY187634                           |                          | Phosphoenolpyruvate carboxylase kinase 2 (LePPCK2); <i>S. lycopersicum</i>                                          | AT1G08650                            | 5                 |
| Les.3989.1.A1_at                    | AJ457049                           |                          | Hero resistance protein 2 homologue; <i>S. lycopersicum</i>                                                         |                                      | 5                 |
| LesAffx.53426.1.S1_at               | AT5G67270                          | 9E-74                    | Microtubule end binding protein 1 (AtEB1C); <i>A. thaliana</i>                                                      |                                      | 4                 |
| <b>Carbohydrate metabolism</b>      |                                    |                          |                                                                                                                     |                                      |                   |
| Les.3522.1.S1_at                    | AF071786                           |                          | Sucrose-phosphate synthase; <i>S. lycopersicum</i>                                                                  | AT5G20280                            | 7                 |
| Les.3069.1.S1_at                    | AT2G22900                          | 4E-22                    | Galactosyl transferase GMA12/MNN10 family protein; <i>A. thaliana</i>                                               |                                      | 5                 |
| Les.3696.1.S1_at                    | AF311943                           | 0                        | Galactinol synthase 1 (LeGolS-1); <i>S. lycopersicum</i>                                                            | AT2G47180                            | 4                 |
| LesAffx.10299.1.A1_at               | DQ104196                           | 2E-77                    | Sorbitol transporter (ST1); <i>Nicotiana langsdorffii</i> x <i>Nicotiana sanderae</i>                               | AT3G18830                            | 4                 |
| <b>Transcription regulation</b>     |                                    |                          |                                                                                                                     |                                      |                   |
| LesAffx.24696.1.S1_at <sup>BH</sup> | X67601                             | 2E-119                   | Heat stress transcription factor 30 (LpHSF30); <i>L. peruvianum</i>                                                 | AT2G26150                            | 200               |
| Les.3551.1.S1_at <sup>BH</sup>      | EU240881                           | 5E-113                   | Ethylene-responsive transcriptional coactivator multiprotein bridging factor ER24 (LeMBF1); <i>S. lycopersicum</i>  | AT3G24500                            | 156               |
| Les.3985.1.S1_at <sup>BH</sup>      | AF500011                           | 3E-179                   | Dehydration responsive element binding protein (LeDREB1); <i>S.</i>                                                 | AT5G05410                            | 14                |



| Affy ID                             | Accession/<br>AGI No. <sup>a</sup> | E-<br>value <sup>b</sup> | Gene description <sup>c</sup>                                                      | Arabidopsis<br>ortholog <sup>d</sup> | Fold <sup>e</sup> |
|-------------------------------------|------------------------------------|--------------------------|------------------------------------------------------------------------------------|--------------------------------------|-------------------|
|                                     |                                    |                          | <i>lycopersicum</i>                                                                |                                      |                   |
| Les.4725.1.S1_at                    | AT5G43990                          | 9E-30                    | Histone-lysine N-methyltransferase/ zinc ion binding (AtSUVR2); <i>A. thaliana</i> |                                      | 14                |
| LesAffx.71311.1.S1_at               | AJ632082                           | 7E-24                    | Zinc finger DNA-binding protein (ZCT1); <i>A. thaliana</i>                         | AT2G37430                            | 12                |
| LesAffx.3163.1.S1_at                | AT4G12040 <sup>P</sup>             | 5E-48                    | Zinc finger (AN1-like) family protein; <i>A. thaliana</i>                          |                                      | 10                |
| LesAffx.3163.2.S1_at                | AT4G22820                          | 2E-30                    | Zinc finger (AN1-like) family protein; <i>A. thaliana</i>                          |                                      | 10                |
| Les.5126.1.S1_at                    | AF053077                           | 5E-69                    | Osmotic stress-induced zinc-finger protein (ZPF); <i>Nicotiana tabacum</i>         | AT1G27730                            | 10                |
| Les.2322.1.A1_at                    | AY044235                           | 2E-103                   | Jasmonate and Ethylene responsive factor 1 (LeJERF1); <i>S. lycopersicum</i>       | AT1G53910                            | 9                 |
| LesAffx.23563.1.A1_at               | AT1G07350                          | 2E-25                    | Transformer serine/arginine-rich ribonucleoprotein, putative; <i>A. thaliana</i>   |                                      | 9                 |
| Les.5292.1.S1_at                    | AT3G27330 <sup>P</sup>             | 5E-03                    | Zinc finger (C3HC4-type RING finger) family protein; <i>A. thaliana</i>            |                                      | 8                 |
| LesAffx.44490.1.S1_at               | EU200164                           | 3E-32                    | Zinc finger-homeodomain protein 1 (ZHD1); <i>Cucumis sativus</i>                   | AT3G28920                            | 7                 |
| Les.4102.1.S1_at                    | AY192368                           | 4E-162                   | Ethylene response factor 2 (LeERF2); <i>S. lycopersicum</i>                        | AT2G47520                            | 6                 |
| LesAffx.66062.1.S1_at               | AT3G56510                          | 1E-68                    | TBP-binding protein, putative; <i>A. thaliana</i>                                  |                                      | 6                 |
| Les.2876.2.S1_at                    | AF208544                           | 3E-79                    | Heat stress transcription factor A3 (LpHSFA3); <i>L. peruvianum</i>                | AT5G03720                            | 4                 |
| LesAffx.70885.1.S1_at               | AJ009594                           | 9E-58                    | Dof protein BBF1 gene (NtBBF1); <i>N. tabacum</i>                                  | AT4G24060                            | 3                 |
| <b>Unclassified</b>                 |                                    |                          |                                                                                    |                                      |                   |
| LesAffx.15004.1.S1_at <sup>BH</sup> | AW737975                           |                          | cDNA, clone: FC25AB05, HTC in fruit; <i>S. lycopersicum</i>                        |                                      | 380               |
| Les.3726.1.S1_at <sup>BH</sup>      | AF204783                           | 4E-112                   | Ripening regulated protein DDTFR8; <i>S. lycopersicum</i>                          |                                      | 130               |
| Les.3822.1.S1_at <sup>BH</sup>      | AF204795                           | 1E-33                    | Ripening regulated protein DDTFR17; <i>S. lycopersicum</i>                         |                                      | 55                |
| Les.1718.1.A1_at <sup>BH</sup>      | AT2G18440 <sup>P</sup>             | 6E-03                    | Gene with untable transcript 15 (GUT15); <i>A. thaliana</i>                        |                                      | 50                |
| Les.195.1.S1_at <sup>BH</sup>       | BM411019                           |                          | Transcribed locus; <i>S. lycopersicum</i>                                          |                                      | 46                |
| Les.5053.1.S1_at <sup>BH</sup>      | BT013184                           |                          | Clone 134261F, mRNA sequence; <i>S. lycopersicum</i>                               |                                      | 43                |
| Les.2329.1.A1_at                    | BG734860                           |                          | Transcribed locus; <i>S. lycopersicum</i>                                          |                                      | 24                |
| Les.1910.1.S1_at                    | AT2G18440 <sup>P</sup>             | 6E-03                    | Gene with untable transcript 15 (GUT15); <i>A. thaliana</i>                        |                                      | 18                |
| Les.1287.1.A1_at                    | BG630588                           |                          | cDNA, clone: FC12DF06, HTC in fruit; <i>S. lycopersicum</i>                        |                                      | 16                |
| LesAffx.65171.1.S1_at               | CN384746                           |                          | NP_175087.1 unknown protein; <i>A. thaliana</i>                                    |                                      | 14                |
| Les.1910.2.S1_at                    | BM409608                           |                          | Transcribed locus; <i>S. lycopersicum</i>                                          |                                      | 13                |
| LesAffx.37707.1.A1_at               | AJ831866                           |                          | Transcribed locus; <i>S. lycopersicum</i>                                          |                                      | 13                |
| Les.1287.2.S1_at                    | AW621773                           |                          | cDNA, clone: FC12DF06, HTC in fruit; <i>S. lycopersicum</i>                        |                                      | 12                |
| LesAffx.66316.1.S1_at               | AT1G24530 <sup>P</sup>             | 8E-41                    | Transducin family protein / WD-40 repeat family protein; <i>A. thaliana</i>        |                                      | 10                |
| Les.2131.2.S1_at                    | BE433043                           |                          | NP_201222.1 unknown protein; <i>A. thaliana</i>                                    |                                      | 10                |
| Les.1910.3.A1_at                    | BG630113                           |                          | Transcribed locus; <i>S. lycopersicum</i>                                          |                                      | 10                |
| Les.1493.1.S1_at                    | AT5G22300                          | 0                        | Nitrilase 4 (AtNIT4); <i>A. thaliana</i>                                           |                                      | 9                 |

| Affy ID               | Accession/<br>AGI No. <sup>a</sup> | E-<br>value <sup>b</sup> | Gene description <sup>c</sup>                                        | Arabidopsis<br>ortholog <sup>d</sup> | Fold <sup>e</sup> |
|-----------------------|------------------------------------|--------------------------|----------------------------------------------------------------------|--------------------------------------|-------------------|
| Les.4752.1.S1_at      | BT013346                           |                          | Clone 135282R, mRNA sequence; <i>S. lycopersicum</i>                 | AT5G63100 <sup>P</sup>               | 9                 |
| LesAffx.57312.1.S1_at | AB061261                           | 2E-110                   | Ankyrin-like protein; <i>Solanum tuberosum</i>                       | AT3G04710                            | 7                 |
| Les.1197.1.S1_at      | AF272710                           | 2E-146                   | 7-transmembrane G-protein-coupled receptor; <i>Solanum chacoense</i> | AT5G65280                            | 7                 |
| Les.1121.1.S1_at      | AT3G63310                          | E-131                    | Glutamate binding; <i>A. thaliana</i>                                |                                      | 7                 |
| Les.2846.3.A1_at      | AT5G11090                          | 2E-06                    | Serine-rich protein-related; <i>A. thaliana</i>                      |                                      | 7                 |
| Les.2846.2.S1_at      | AT5G11090                          | 8E-36                    | Serine-rich protein-related; <i>A. thaliana</i>                      |                                      | 6                 |
| Les.1409.3.S1_at      | BE461946                           |                          | cDNA, clone: FC21BA06, HTC in fruit; <i>S. lycopersicum</i>          |                                      | 6                 |
| LesAffx.17663.2.A1_at | CK715113                           |                          | NP_563626.1 unknown protein; <i>A. thaliana</i>                      |                                      | 6                 |
| LesAffx.17663.1.S1_at | AY822468                           | 2E-93                    | AT-rich element binding factor 3 (PsATF3); <i>Pisum sativum</i>      | AT4G01030                            | 5                 |
| Les.2131.1.A1_at      | BG627099                           |                          | NP_201222.1 unknown protein; <i>A. thaliana</i>                      |                                      | 5                 |
| LesAffx.71454.1.S1_at | AT2G17440                          | 1E-88                    | Leucine-rich repeat family protein; <i>A. thaliana</i>               |                                      | 4                 |
| Les.4258.3.S1_at      |                                    | E-134                    | ABC2 homolog 13 (AtATH13); <i>A. thaliana</i>                        |                                      | 4                 |
| Les.4225.1.S1_at      | BG631475                           |                          | cDNA, clone: FC06BB09, HTC in fruit; <i>S. lycopersicum</i>          |                                      | 4                 |

Results are presented as the fold difference between the mean-value derived from 12 replicates of heat-stressed vs. the mean value derived from 12 replicates of control microspores. Genes found to be statistically significant (p-value<0.05) are presented in this table.

<sup>a</sup> Either tomato NCBI accession number, GenBank homolog or *Arabidopsis* genome initiative number of best hit from TBLASTX search, using a significance threshold of 1E-4 are given for each Affy ID number.

<sup>b</sup> E-value indicating the significance level of homology to the corresponding gene.

<sup>c</sup> Gene function predicted by the Affymetrix annotation, TIGR definition, and NCBI database.

<sup>d</sup> Arabidopsis genome initiative number is given for *Arabidopsis* gene orthologs.

<sup>e</sup> The RMA-normalized ratio of gene expression in heat-stressed (n=12) vs. control (n=12) microspores.

<sup>BH</sup> To ensure no more than 5% false discovery rate, the BH approach for multiple comparison correction (Benjamini and Hochberg, 1995) was used. Genes that were less than the adjusted p-value of 5% are marked by 'BH', the rest (unmarked) are statistically significant (p-value<0.05, not corrected).

<sup>P</sup> Gene sequences found to be highly expressed in *Arabidopsis* pollen grains under control conditions (Zimmermann *et al.*, 2004).

**Table S4.** Summary of HS-responsive transcript-derived fragments (TDFs) of maturing tomato pollen grains representing unknown proteins and unidentified sequences

| TDF <sup>a</sup>              | Primer combination <sup>b</sup> | Length (bp) <sup>c</sup> | HS response <sup>d</sup> | Exp. pattern <sup>e</sup> | Gene description <sup>f</sup>                                                | Accession/AGI No. <sup>g</sup> | E-value <sup>h</sup> |
|-------------------------------|---------------------------------|--------------------------|--------------------------|---------------------------|------------------------------------------------------------------------------|--------------------------------|----------------------|
| <b>Unknown proteins</b>       |                                 |                          |                          |                           |                                                                              |                                |                      |
| TDF24.2                       | E-ACA/ M-CTT                    | 215                      | +                        | A                         | Chromosome 1 BAC T8L23 genomic sequence; <i>A. thaliana</i>                  | AC079733                       | 8E-04                |
| TDF12.2                       | E-ACT/ M-CTG                    | 278                      | +                        | A                         | Hypothetical protein; <i>A. thaliana</i>                                     | AT1G15670                      | 4 E-19               |
| TDF14.3                       | E-ACA/ M-CAG                    | 309                      | +                        | A                         | Protein binding; <i>A. thaliana</i>                                          | AT1G44910                      | 8E-04                |
| TDF27.3                       | E-ACT/ M-CTG                    | 186                      | —                        | B                         | Unknown protein; <i>A. thaliana</i>                                          | AT3G54100                      | 9E-09                |
| TDF32.2                       | E-ACT/ M-CTT                    | 173                      | +                        | C                         | Clone 135129R; <i>S. lycopersicum</i>                                        | BT013338                       | 1E-19                |
| TDF36.1                       | E-ACA/ M-CAG                    | 145                      | +                        | A                         | EST from severe drought-stressed opposite wood; <i>Populus</i>               | CU233588                       | 4E-15                |
| TDF18.2                       | E-ACT/ M-CTT<br>E-ACT/ M-CTG    | 243                      | +                        | A                         | DNA sequence from clone LE_Hba-24G5 on chromosome 4; <i>S.lycopersicum</i>   | CU019619                       | 3E-12                |
| TDF32.3*                      |                                 | 147                      | +                        | B                         | DNA sequence from clone LE_Hba-331L22 on chromosome 4; <i>S.lycopersicum</i> | CU222538                       | 1E-15                |
| TDF51.1                       | E-ACT/ M-CAA                    | 93                       | +                        | D                         | Chromosome 5 clone PGEC160O2; <i>S. demissum</i>                             | AC150162                       | 0.006                |
| TDF3.4                        | E-ACA/ M-CTT                    | 556                      | +                        | A                         | Cchromosome 5 clone PGEC872C13; <i>S. demissum</i>                           | AC149266                       | 3E-25                |
| TDF4.6                        | E-ACT/ M-CTG                    | 564                      | +                        | A                         | Chromosome 5 clone PGEC872C13; <i>S. demissum</i>                            | AC149266                       | 2E-16                |
| TDF4.7                        | E-ACT/ M-CTG                    | 561                      | +                        | A                         | Chromosome 5 clone PGEC872C14; <i>S. demissum</i>                            | AC149267                       | 2E-16                |
| TDF17.5                       | E-ACT/ M-CTG                    | 268                      | +                        | A                         | cDNA, clone: LEFL1004CE03, HTC in leaf; <i>S. lycopersicum</i>               | K247357                        | 1E-28                |
| TDF4.8                        | E-ACT/ M-CTT                    | 545                      | +                        | A                         | cDNA, clone: LEFL1008AH06, HTC in leaf; <i>S. lycopersicum</i>               | AK247369                       | 2E-84                |
| TDF51.2                       | E-ACT/ M-CTT                    | 473                      | +                        | A                         | cDNA, clone: LEFL1008AH06, HTC in leaf; <i>S. lycopersicum</i>               | AK247369                       | 2E-84                |
| TDF17.6                       | E-ACT/ M-CTG                    | 369                      | +                        | A                         | cDNA, clone: LEFL1008AH06, HTC in leaf; <i>S. lycopersicum</i>               | AK247369                       | 2E-84                |
| TDF15.1                       | E-ACA/ M-CTG                    | 330                      | +                        | A                         | Chromosome 3 clone C03Hba0233O20; <i>S. lycopersicum</i>                     | EU124739                       | 2E-38                |
| TDF15.2                       | E-ACA/ M-CTT                    | 343                      | +                        | A                         | Chromosome 3 clone C03Hba0233O20; <i>S. lycopersicum</i>                     | EU124739                       | 1E-42                |
| TDF14.3                       | E-ACA/ M-CTT                    | 314                      | +                        | A                         | Chromosome 9 clone C09Hba0165P17; <i>S. lycopersicum</i>                     | EF647605                       | 0.001                |
| TDF46.1                       | E-ACA/ M-CAG                    | 104                      | +                        | A                         | Tomato chromosome 2, C02Sle0121H01; <i>S. lycopersicum</i>                   | AC215464                       | 2E-6                 |
| <b>Unidentified sequences</b> |                                 |                          |                          |                           |                                                                              |                                |                      |
| TDF27.4                       | E-ACA/ M-CAG                    | 159                      | +                        | A                         | Unidentified                                                                 |                                |                      |
| TDF36.2                       | E-ACA/ M-CAG                    | 101                      | +                        | A                         | Unidentified                                                                 |                                |                      |
| TDF20.1                       | E-ACA/ M-CAG                    | 208                      | +                        | A                         | Unidentified                                                                 |                                |                      |
| TDF14.5                       | E-ACA/ M-CTC                    | 300                      | +                        | A                         | Unidentified                                                                 |                                |                      |
| TDF20.2                       | E-ACA/ M-CAG                    | 250                      | +                        | A                         | Unidentified                                                                 |                                |                      |

| <b>TDF<sup>a</sup></b> | <b>Primer combination<sup>b</sup></b> | <b>Length (bp)<sup>c</sup></b> | <b>HS response<sup>d</sup></b> | <b>Exp. pattern<sup>e</sup></b> | <b>Gene description<sup>f</sup></b> | <b>Accession/AGI No.<sup>g</sup></b> | <b>E-value<sup>h</sup></b> |
|------------------------|---------------------------------------|--------------------------------|--------------------------------|---------------------------------|-------------------------------------|--------------------------------------|----------------------------|
| TDF27.5                | E-ACA/ M-CAG                          | 239                            | +                              | A                               | Unidentified                        |                                      |                            |
| TDF45.1                | E-ACA/ M-CAG                          | 100                            | +                              | A                               | Unidentified                        |                                      |                            |
| TDF57                  | E-ACA/ M-CAG                          | 130                            | +                              | A                               | Unidentified                        |                                      |                            |
| TDF61                  | E-ACA/ M-CAG                          | 198                            | +                              | A                               | Unidentified                        |                                      |                            |
| TDF11.2                | E-ACA/ M-CAA                          | 289                            | +                              | A                               | Unidentified                        |                                      |                            |
| TDF42.2                | E-ACA/ M-CAA                          | 61                             | +                              | A                               | Unidentified                        |                                      |                            |
| TDF49                  | E-ACA/ M-CAA                          | 54                             | +                              | A                               | Unidentified                        |                                      |                            |
| TDF50                  | E-ACA/ M-CAA                          | 51                             | +                              | A                               | Unidentified                        |                                      |                            |
| TDF35                  | E-ACA/ M-CTC                          | 130                            | +                              | A                               | Unidentified                        |                                      |                            |
| TDF40.1                | E-ACA/ M-CTC                          | 106                            | +                              | A                               | Unidentified                        |                                      |                            |
| TDF14.6                | E-ACA/ M-CTA                          | 131                            | +                              | A                               | Unidentified                        |                                      |                            |
| TDF10.2                | E-ACT/ M-CTG                          | 304                            | +                              | A                               | Unidentified                        |                                      |                            |
| TDF60.1                | E-ACA/ M-CTT                          | 59                             | +                              | A                               | Unidentified                        |                                      |                            |
| TDF5.1                 | E-ACT/ M-CTT                          | 407                            | +                              | A                               | Unidentified                        |                                      |                            |
| TDF12.3                | E-ACT/ M-CTT                          | 300                            | +                              | A                               | Unidentified                        |                                      |                            |
| TDF5.2                 | E-ACT/ M-CTT                          | 405                            | +                              | A                               | Unidentified                        |                                      |                            |
| TDF12.4                | E-ACT/ M-CTT                          | 307                            | +                              | A                               | Unidentified                        |                                      |                            |
| TDF10.3                | E-ACT/ M-CTG                          | 306                            | +                              | A                               | Unidentified                        |                                      |                            |
| TDF60.2                | E-ACA/ M-CTT                          | 63                             | +                              | A                               | Unidentified                        |                                      |                            |
| TDF12.5                | E-ACT/ M-CTT                          | 375                            | +                              | A                               | Unidentified                        |                                      |                            |
| TDF17.7                | E-ACT/ M-CTG                          | 316                            | +                              | A                               | Unidentified                        |                                      |                            |
| TDF46.2                | E-ACA/ M-CAG                          | 160                            | +                              | A                               | Unidentified                        |                                      |                            |
| TDF12.6                | E-ACT/ M-CTG                          | 361                            | +                              | A                               | Unidentified                        |                                      |                            |
| TDF23.2                | E-ACA/ M-CAG                          | 230                            | +                              | C                               | Unidentified                        |                                      |                            |
| TDF23.1                | E-ACA/ M-CAG                          | 189                            | +                              | C                               | Unidentified                        |                                      |                            |
| TDF5.3                 | E-ACA/ M-CTT                          | 425                            | +                              | E                               | Unidentified                        |                                      |                            |
| TDF51.3                | E-ACT/ M-CAA                          | 87                             | +                              | D                               | Unidentified                        |                                      |                            |
| TDF53                  | E-ACT/ M-CTT                          | 143                            | +                              | D                               | Unidentified                        |                                      |                            |
| TDF30                  | E-ACT/ M-CAC                          | 136                            | +                              | D                               | Unidentified                        |                                      |                            |
| TDF38.1                | E-ACT/ M-CAG                          | 79                             | +                              | A                               | Unidentified                        |                                      |                            |
| TDF38.2                | E-ACT/ M-CAG                          | 129                            | +                              | A                               | Unidentified                        |                                      |                            |
| TDF18.3                | E-ACT/ M-CTT                          | 302                            | +                              | A                               | Unidentified                        |                                      |                            |

| TDF <sup>a</sup> | Primer combination <sup>b</sup> | Length (bp) <sup>c</sup> | HS response <sup>d</sup> | Exp. pattern <sup>e</sup> | Gene description <sup>f</sup> | Accession/AGI No. <sup>g</sup> | E-value <sup>h</sup> |
|------------------|---------------------------------|--------------------------|--------------------------|---------------------------|-------------------------------|--------------------------------|----------------------|
| TDF45.2          | E-ACT/ M-CAG                    | 100                      | +                        | A                         | Unidentified                  |                                |                      |
| TDF27.6          | E-ACT/ M-CTT                    | 192                      | –                        | B                         | Unidentified                  |                                |                      |
| TDF40.2          | E-ACA/ M-CAA                    | 96                       | –                        | B                         | Unidentified                  |                                |                      |
| TDF42.3          | E-ACT/ M-CTT                    | 97                       | –                        | B                         | Unidentified                  |                                |                      |
| TDF42.4          | E-ACT/ M-CTT                    | 115                      | –                        | B                         | Unidentified                  |                                |                      |

a, TDF number, representing the relative location on the acryl-amid gel. Fragments with the same location, representing different treatment groups or primer combinations are marked .n.

b, primer combination used for the fragment amplification: E indicates *EcoRI*, M indicates *MseI*.

c, length of the TDF sequence.

d, induction (+) or repression (-) of expression by heat-stress, detected in at least one of the tested stages of microspore development and one of the cultivars.

e, gene expression (Exp.) pattern. Expression patterns were divided into five categories: A-E. A, represents HS-induced expression in either or both developmental stages tested, in both cultivars. B, represents HS-down-regulated expression in both cultivars in microspores at either A-3 or A-5 developmental stage. C, represents constitutive expression in microspores of *cv.* 3017 and HS-induced in maturing microspores of *cv.* 3042 at either or both developmental stages. D, represents constitutive expression in *cv.* 3042

and HS-induced expression in microspores of *cv.* 3017 at either or both developmental stages. E, represents constitutive expression in microspores of *cv.* 3017 and HS-down-regulation in microspores of *cv.* 3042 at A-3.

f, gene description according to NCBI, TAIR or TIGR databases annotation.

g, either tomato NCBI accession number (No.), GenBank homolog or *Arabidopsis* genome initiative number (AGI) of best hit from TBLASTX search, using a significance threshold of 1.00E-4 are given for each TDF.

h, E-value indicating the significance level of homology to the corresponding gene.

\*, TDF sequences found on the Affymetrix GeneChip® Tomato Genome Array. All TDFs sequences were checked using NETAFFX program of the Affymetrix service site (<http://www.affymetrix.com/analysis/index.affx>) for identifying TDFs which are presented on the Affymetrix chip.
